# Supplementary material for: The influence of language contact and ethnic identification on Chinese as a second language learners’ oral proficiency
Source: publisher site journal article supplement (doi:10.1515/iral-2023-0221), 2024-01-23
Supplement: Supplementary file 1 [file j_iral-2023-0221_suppl_001.docx]

This work was supported by grants from

International Chinese Education Research Project of the Center for Language Education and Cooperation, Ministry of Education (Grant No. 20YH16C),

Research Project of the International Chinese Education Base of the Center for Language Education and Cooperation, Ministry of Education (Grant No. 22YHJD1030),

Research Funds of School of Chinese Studies and Culture Exchange, Renmin University of China (Grant No. RMSCSCE-21002).
